# Supplementary material for: Highly efficient heritable targeted deletions of gene clusters and non-coding regulatory regions in Arabidopsis using CRISPR/Cas9
Source: PubMed Central journal article supplement (PMC5849686; doi:10.1038/s41598-018-22667-1), 2018-03-13
Supplement: 41598_2018_22667_MOESM1_ESM.pdf [file 41598_2018_22667_MOESM1_ESM.pdf]

**Running Title:**

Highly efficient heritable targeted deletions of gene clusters and non-coding regulatory regions in *Arabidopsis* using CRISPR/Cas9

**Authors and Author's Addresses:**

Julius Durr<sup>1</sup>, Ranjith Papareddy<sup>1</sup>, Keiji Nakajima<sup>2,3</sup> and Jose Gutierrez-Marcos<sup>1\*</sup>

<sup>1</sup>School of Life Sciences, University of Warwick, Coventry CV4 7AL, UK

<sup>2</sup> Graduate School of Biological Sciences, Nara Institute of Science and Technology, Nara 630-0192, Japan

<sup>3</sup> PRESTO, Japan Science and Technology Agency, Saitama 332-0012, Japan

**\*Correspondence:**

[j.f.gutierrez-marcos@warwick.ac.uk](mailto:j.f.gutierrez-marcos@warwick.ac.uk)

University of Warwick, School of Life Sciences, Coventry CV4 7AL, UK

Tel.: +44 2476 575077



|       |                 |                                                          |
|-------|-----------------|----------------------------------------------------------|
| JD01  | sgRNA1 fw       | GCGGCCGCGGCAAATAATGATTTTATTTTG                           |
| JD02  | sgRNA1 rv       | AATTCTGCAGTAATGCCAACTTTGTACAAG                           |
| JD03  | sgRNA2 fw       | AATTCTGCAGCTTTTTTTCTTCTTCTTCGT                           |
| JD04  | sgRNA2 rv       | AATTGAGCTCCAAATAATGATTTTATTTT                            |
| JD08  | OLE1::RFP fw    | AATTGTTTTAAACAGTGTATGTAGGTATAGTAA                        |
| JD09  | OLE1::RFP rv    | AATTGTTTTAAACTCTAGTAACATAGATGACAC                        |
| JD125 | EF1a fw         | CTCACATTTTCGTAGCCGCAAGAC                                 |
| JD126 | EF1a rv         | GATCAAGTGACCAGTTGTGGTTCGAT                               |
| JD151 | GABI o8409      | ATATTGACCATCATACTCATTGC                                  |
| JD157 | CR-ISU1 fw      | GAGACGAGTTATATAGTGGGAC                                   |
| JD158 | CR-ISU1 rv      | GGATCTAAGACTAAGATGACAA                                   |
| JD160 | CR-ISU1 inrv    | GCTGTCACACACTCTACGCCCAT                                  |
| JD271 | CNI1 fw         | CAGTTTCCACAGTTAATCATTGAGCGTCA                            |
| JD272 | CNI1 rv         | GGACGAGACACGTAGAGTTATACCAATGTG                           |
| JD335 | At4g22220 BP fw | GGGGACAAGTTTGTACAAAAAAGCAGGCTCTGAATACACCCCCGACTCTTATTG   |
| JD336 | At4g22220 BP rv | GGGGACCACTTTGTACAAGAAAGCTGGGTGAGCCTGTGTGGTTTCTCCTGCTGCTG |
| JD337 | GABI_424D02 LP  | TTGATGGTCAGAACATCCTCC                                    |
| JD338 | GABI_424D02 RP  | ATCTAGACGAAGACATTGCGC                                    |
| JD368 | pEC1-Cas9 fw    | aattGAATTCgaataaaagcatttgcgtttggtt                       |
| JD369 | pEC1-Cas9 rv    | aattTTAATTAACCTAGGgttgtcaatcaattggcaagtc                 |
| JD460 | CR-At5g04560 fw | GGAGAATCAAACCTCAACAAGAGTTC                               |
| JD461 | CR-At5g04560 rv | GGAGAAGTCACCTCACTCCTGC                                   |
| JD575 | At2g21650 fw    | ACATCTTTTGACGTTTTATACCCTT                                |
| JD576 | At2g21650 rv    | CGTCTGAAATGAGGAGTGGCT                                    |

1B

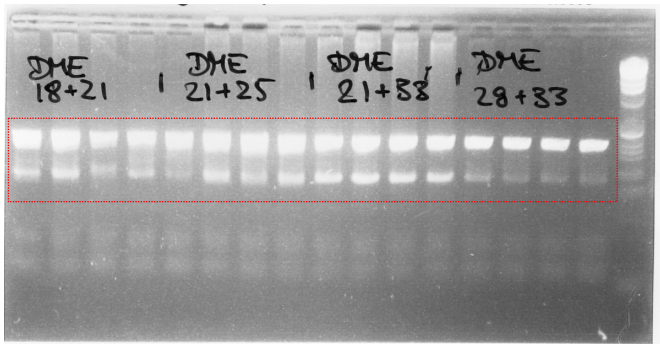

2B

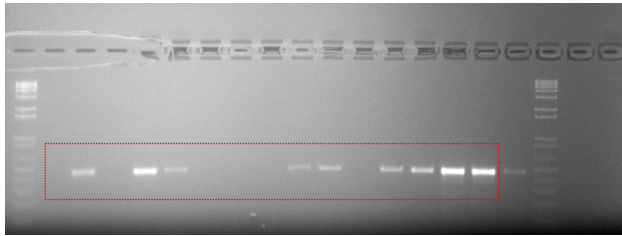

deletion

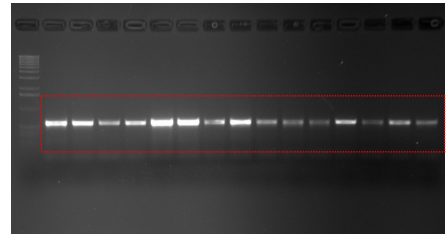

*At5g60390*

2F

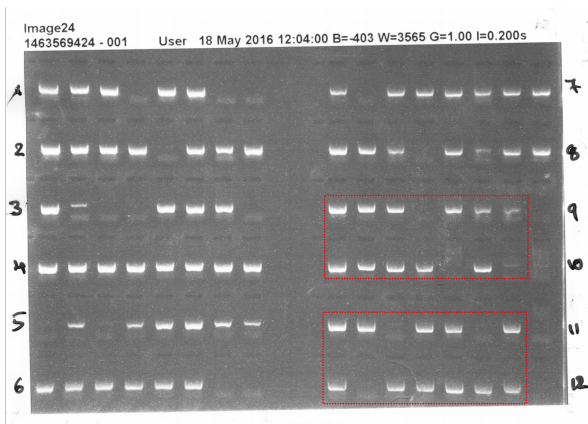

*isu1-d1/ISU1-YFP.A8*

*isu1-d1/ISU1-YFP.E3*

3B

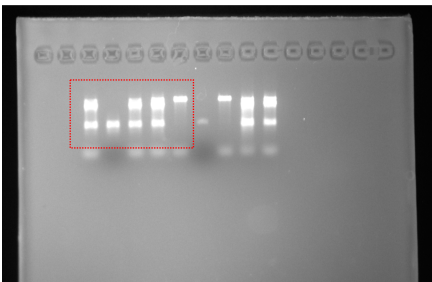

4B

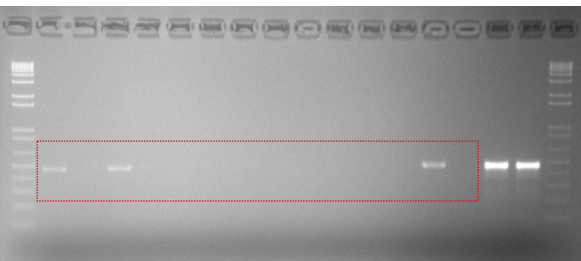

deletion

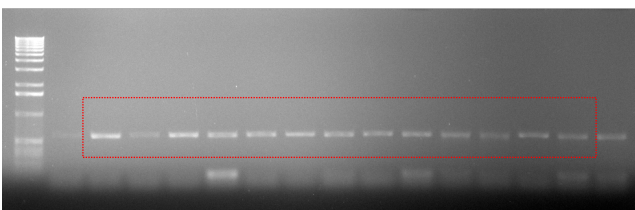

*At5g60390*
